# Supplementary material for: Poly(β-amino ester)s-Based Delivery Systems for Targeted Transdermal Vaccination
Source: MDPI journal article supplement (doi:10.3390/pharmaceutics15041262), 2023-04-17
Supplement: s1 [file s1]

## Figure S1

### NMR Spectra:

#### CR3-Man-C6

**<sup>1</sup>H-NMR:** (400 MHz, CD<sub>3</sub>OD, TMS) (ppm):  $\delta$  = 4.41-4.33 (br, NH<sub>2</sub>-C(=O)-CH-NH-C(=O)-CH-NH-C(=O)-CH-NH-C(=O)-CH-CH<sub>2</sub>-), 4.11 (t, CH<sub>2</sub>-CH<sub>2</sub>-O), 3.55 (t, CH<sub>2</sub>-CH<sub>2</sub>-OH), 3.22 (br, NH<sub>2</sub>-C(=NH)-NH-CH<sub>2</sub>-), OH- (CH<sub>2</sub>)<sub>4</sub>-CH<sub>2</sub>-N-), 3.04 (t, CH<sub>2</sub>-CH<sub>2</sub>-N-), 2.82 (dd, -CH<sub>2</sub>-S-CH<sub>2</sub>), 2.48 (br, -N-CH<sub>2</sub>-CH<sub>2</sub>-C(=O)-O), 1.90 (m, NH<sub>2</sub>-C(=NH)-NH-(CH<sub>2</sub>)<sub>2</sub>-CH<sub>2</sub>-CH-), 1.73 (br, -O-CH<sub>2</sub>-CH<sub>2</sub>-CH<sub>2</sub>-CH<sub>2</sub>-O), 1.69 (m, NH<sub>2</sub>-C(=NH)-NH-CH<sub>2</sub>-CH<sub>2</sub>-CH<sub>2</sub>-), 1.56 (br, -CH<sub>2</sub>-CH<sub>2</sub>-CH<sub>2</sub>-CH<sub>2</sub>-OH), 1.39 (br, -N-(CH<sub>2</sub>)<sub>2</sub>-CH<sub>2</sub>-(CH<sub>2</sub>)<sub>2</sub>-OH), 0.88 (t, CH<sub>2</sub>-CH<sub>2</sub>-CH<sub>3</sub>).

#### CK3-Man-C6

**<sup>1</sup>H-NMR:** (400 MHz, CD<sub>3</sub>OD, TMS) (ppm):  $\delta$  = 4.38-4.29 (br, NH<sub>2</sub>-(CH<sub>2</sub>)<sub>4</sub>-CH-), 4.13 (t, CH<sub>2</sub>-CH<sub>2</sub>-O-), 3.73 (br, NH<sub>2</sub>-CH-CH<sub>2</sub>-S-), 3.55 (t, CH<sub>2</sub>-CH<sub>2</sub>-OH), 2.94 (br, CH<sub>2</sub>-CH<sub>2</sub>-N-, NH<sub>2</sub>-CH<sub>2</sub>-(CH<sub>2</sub>)<sub>3</sub>-CH-), 2.81 (dd, -CH<sub>2</sub>-S-CH<sub>2</sub>), 2.57 (br, -N-CH<sub>2</sub>-CH<sub>2</sub>-C(=O)-O), 1.85 (m, NH<sub>2</sub>-(CH<sub>2</sub>)<sub>3</sub>-CH<sub>2</sub>-CH-), 1.74 (br, -O-CH<sub>2</sub>-CH<sub>2</sub>-CH<sub>2</sub>-CH<sub>2</sub>-O), 1.68 (m, NH<sub>2</sub>-CH<sub>2</sub>-CH<sub>2</sub>-(CH<sub>2</sub>)<sub>2</sub>-CH-), 1.54 (br, -CH<sub>2</sub>-CH<sub>2</sub>-CH<sub>2</sub>-CH<sub>2</sub>-OH), 1.37 (br, -N-(CH<sub>2</sub>)<sub>2</sub>-CH<sub>2</sub>-(CH<sub>2</sub>)<sub>2</sub>-OH), 0.88 (t, CH<sub>2</sub>-CH<sub>2</sub>-CH<sub>3</sub>).

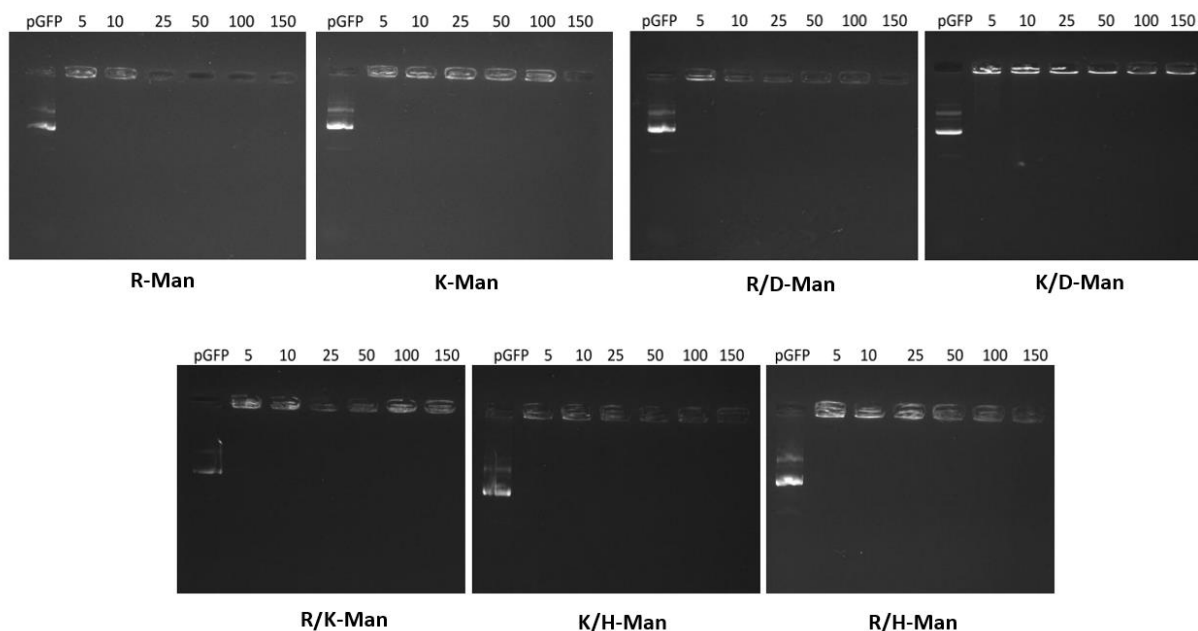

**Figure S2.** Gel retardation assays of polyplexes formulated with distinct mixtures of different OM-C6-PBAEs. Complexes were prepared as described combining cationic and anionic polymers at the established ratios and electrophoresed at 120 V for one hour. Naked pGFP was used as control group in order to evaluate the maximum DNA migration.
